# Supplementary material
Source: HighWire-hosted journal article supplement (https://ard.bmj.com/content/79/4/525)
Supplement: inline-supplementary-material-2 [file inline-supplementary-material-2.pdf]

FORWARD thinning/thickening manuscript\_re-submission\_December 2019

**Supplementary Table S2** Change from baseline in cartilage thickness ( $\mu\text{m}$ ) by ordered values at 24 months (mITT Analysis Set)

| <b>Ordered Value</b> | <b>Placebo</b>          | <b>Sprifermin 100 <math>\mu\text{g}</math> q6mo</b> |
|----------------------|-------------------------|-----------------------------------------------------|
| <b>Mean (95% CI)</b> | <b>(N=96)</b>           | <b>(N=101)</b>                                      |
| OV1                  | -199.5 (-242.2, -156.8) | -139.7 (-166.8, -112.5)                             |
| OV2                  | -130.7 (-160.4, -101.1) | -83.0 (-102.0, -64.0)                               |
| OV3                  | -104.7 (-133.3, -76.2)  | -50.8 (-65.1, -36.5)                                |
| OV4                  | -80.3 (-106.1, -54.5)   | -31.3 (-43.7, -19.0)                                |
| OV5                  | -65.1 (-88.3, -41.9)    | -18.0 (-29.3, -6.6)                                 |
| OV6                  | -48.4 (-66.9, -29.9)    | -5.3 (-16.7, 6.2)                                   |
| OV7                  | -32.1 (-48.9, -15.3)    | 7.2 (-4.5, 18.9)                                    |
| OV8                  | -20.4 (-35.1, -5.7)     | 20.3 (9.1, 31.5)                                    |
| OV9                  | -6.8 (-18.4, 4.7)       | 31.5 (20.3, 42.7)                                   |
| OV10                 | 6.3 (-3.9, 16.5)        | 44.0 (32.2, 55.7)                                   |
| OV11                 | 19.5 (10.3, 28.7)       | 58.1 (46.0, 70.1)                                   |
| OV12                 | 31.1 (22.2, 39.9)       | 73.9 (60.8, 87.1)                                   |
| OV13                 | 42.2 (32.9, 51.6)       | 89.6 (75.0, 104.2)                                  |
| OV14                 | 60.9 (51.0, 70.8)       | 107.4 (92.7, 122.2)                                 |
| OV15                 | 80.6 (70.6, 90.6)       | 132.5 (115.4, 149.6)                                |
| OV16                 | 112.7 (101.0, 124.4)    | 187.6 (163.9, 211.3)                                |

CI, confidence interval; mITT, modified intention-to-treat; OV, ordered value; q6mo, every 6 months active cycle.
